# Supplementary material for: The Role of GPR109a Signaling in Niacin Induced Effects on Fed and Fasted Hepatic Metabolism
Source: PubMed Central journal article supplement (PMC8069761; doi:10.3390/ijms22084001), 2021-04-13
Supplement: ijms-22-04001-s001.pdf [file ijms-22-04001-s001.pdf]

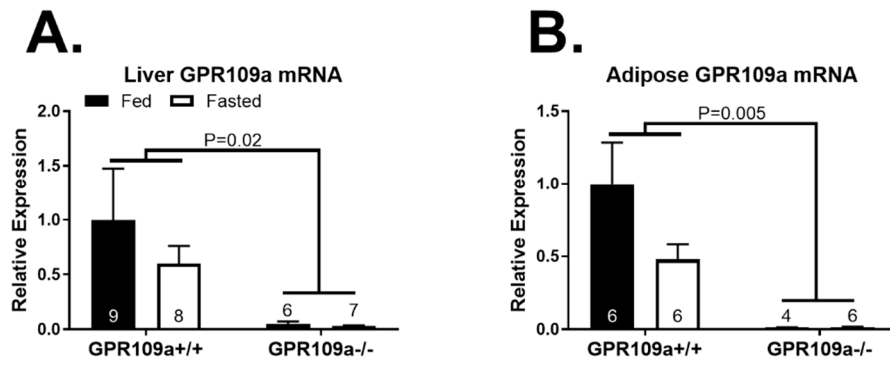

**Supplemental Figure 1.** Validation of GPR109a knockout. GPR109a mRNA expression in (A) liver and (B) adipose tissue. The effect of genotype was assessed by mixed model ANOVA. Number inside or above bar denotes n per group.
